# Supplementary material
Source: publisher site journal article supplement (https://www.dovepress.com/article/107312)
Supplement: Supplementary file 1 [file get_supplementary_file.php%3Ff%3D107312_1.pdf]

| Climatic factors          |                                  | 2006                              |                                    |                                    |                                    |                         |                      |           |                                           |
|---------------------------|----------------------------------|-----------------------------------|------------------------------------|------------------------------------|------------------------------------|-------------------------|----------------------|-----------|-------------------------------------------|
|                           |                                  | Rainfall<br>(mm)                  | Hours of sunshine<br>(>1200 W/m2)  | Solar radiation<br>(MJ /m2)        | T <sup>a</sup> max (°C)            | T <sup>a</sup> min (°C) | ET <sub>o</sub> (mm) | VPD (kPa) | Dif T <sup>a</sup> max-T <sup>a</sup> min |
| January                   |                                  | 46.7                              | 194                                | 98.14                              | 10.64                              | -2.3                    | 27.2                 | 0.25      | 12.94                                     |
| February                  |                                  | 12.6                              | 217                                | 148.93                             | 12.61                              | 4.8                     | 43.6                 | 0.41      | 7.81                                      |
| March                     |                                  | 0.3                               | 287                                | 222.97                             | 19.25                              | 7.55                    | 101.9                | 0.93      | 11.70                                     |
| April                     |                                  | 30.7                              | 315                                | 268.78                             | 20.01                              | 12.95                   | 121.4                | 0.95      | 7.06                                      |
| May                       |                                  | 71                                | 316                                | 266.57                             | 26.11                              | 14.18                   | 133                  | 1.1       | 11.93                                     |
| June                      |                                  | 0.3                               | 348                                | 290.78                             | 26.84                              | 15.73                   | 169                  | 1.61      | 11.11                                     |
| July                      |                                  | 13.6                              | 367                                | 310.18                             | 29.31                              | 24.42                   | 200.2                | 2.33      | 4.89                                      |
| August                    |                                  | 0.8                               | 351                                | 278.59                             | 29.12                              | 19.17                   | 172.7                | 1.91      | 9.95                                      |
| September                 |                                  | 49.1                              | 284                                | 213.09                             | 24.9                               | 17.81                   | 116.9                | 1.4       | 7.09                                      |
| October                   |                                  | 2.3                               | 270                                | 158.66                             | 23.09                              | 15.98                   | 83.7                 | 1.16      | 7.11                                      |
| November                  |                                  | 55.6                              | 178                                | 96.13                              | 18.89                              | 9.84                    | 40.4                 | 0.55      | 9.05                                      |
| December                  |                                  | 1.8                               | 187                                | 92.98                              | 13.76                              | 4.23                    | 38.2                 | 0.48      | 9.53                                      |
| Total/average             |                                  | 284.80                            | 3314.00                            | 203.82                             | 21.21                              | 12.03                   | 1248.10              | 1.09      | 9.18                                      |
| Dormancy                  | December-March                   | 61.4                              | 221.25                             | 140.755                            | 14.065                             | 3.57                    | 210.9                | 0.52      | 10.50                                     |
| Budburst-Fruit set        | April-May                        | 101.7                             | 315.5                              | 267.675                            | 23.06                              | 13.565                  | 254.4                | 1.03      | 9.50                                      |
| Fruit-set-veraison        | June-July                        | 13.9                              | 357.5                              | 300.48                             | 28.075                             | 20.075                  | 369.2                | 1.97      | 8.00                                      |
| Veraison-harvest          | August-mid-end September         | 49.9                              | 317.5                              | 245.84                             | 27.01                              | 18.49                   | 289.6                | 1.66      | 8.52                                      |
| Postharvest               | mid-end september-October        | 57.9                              | 224                                | 127.395                            | 20.99                              | 12.91                   | 124.1                | 0.86      | 8.08                                      |
| <b>Number of days</b>     |                                  | <b>2006</b>                       |                                    |                                    |                                    |                         |                      |           |                                           |
|                           |                                  | <b>T<sup>a</sup>max &gt; 35°C</b> | <b>T<sup>a</sup>max &gt; 30 °C</b> | <b>T<sup>a</sup>min &gt; 15 °C</b> | <b>T<sup>a</sup>min &lt; 15 °C</b> |                         |                      |           |                                           |
| <b>Budburst-Fruit set</b> | <b>April-May</b>                 | 1                                 | 3                                  | 9                                  | 52                                 |                         |                      |           |                                           |
| <b>Fruit-set-veraison</b> | <b>June-July</b>                 | 9                                 | 44                                 | 49                                 | 12                                 |                         |                      |           |                                           |
| <b>Veraison-harvest</b>   | <b>August-mid-end September</b>  | 4                                 | 36                                 | 43                                 | 11                                 |                         |                      |           |                                           |
| <b>Postharvest</b>        | <b>mid-end september-October</b> | 0                                 | 3                                  | 4                                  | 34                                 |                         |                      |           |                                           |

| <b>Climatic factors</b>   |                                  |                 |                                   |                                    |                                    |                                    |                 |                  |                                              |  |
|---------------------------|----------------------------------|-----------------|-----------------------------------|------------------------------------|------------------------------------|------------------------------------|-----------------|------------------|----------------------------------------------|--|
|                           |                                  |                 |                                   |                                    | <b>2007</b>                        |                                    |                 |                  |                                              |  |
|                           |                                  | <b>Rainfall</b> | <b>Hours of sunshine</b>          | <b>Solar radiation</b>             |                                    |                                    |                 |                  |                                              |  |
|                           |                                  | <b>(mm)</b>     | <b>(&gt;1200 W/m2)</b>            | <b>(MJ /m2)</b>                    | <b>T<sup>a</sup> max (°C)</b>      | <b>T<sup>a</sup>min (°C)</b>       | <b>Eto (mm)</b> | <b>VPD (kPa)</b> | <b>Dif T<sup>a</sup>max-T<sup>a</sup>min</b> |  |
| January                   |                                  | 24.4            | 186                               | 93.7                               | 12.29                              | 1.97                               | 42.8            | 0.55             | 10.32                                        |  |
| February                  |                                  | 18.1            | 220                               | 133.51                             | 15.35                              | 6.11                               | 58.7            | 0.61             | 9.24                                         |  |
| March                     |                                  | 49              | 278                               | 194.74                             | 17.23                              | 7.33                               | 104.3           | 0.86             | 9.90                                         |  |
| April                     |                                  | 55.4            | 281                               | 178.92                             | 17.96                              | 8.37                               | 86              | 0.62             | 9.59                                         |  |
| May                       |                                  | 14.3            | 360                               | 292.35                             | 23.15                              | 11.6                               | 162.7           | 1.42             | 11.55                                        |  |
| June                      |                                  | 0.2             | 356                               | 312.83                             | 28.03                              | 19.7                               | 178.6           | 1.83             | 8.33                                         |  |
| July                      |                                  | 1.3             | 371                               | 318.32                             | 27.32                              | 22.1                               | 194.5           | 2.12             | 5.22                                         |  |
| August                    |                                  | 21.3            | 340                               | 253.78                             | 29.08                              | 19.79                              | 160.8           | 1.9              | 9.29                                         |  |
| September                 |                                  | 16.3            | 288                               | 205.02                             | 22.96                              | 16.97                              | 107.6           | 1.24             | 5.99                                         |  |
| October                   |                                  | 84.6            | 247                               | 134.79                             | 20.14                              | 11.24                              | 66.6            | 0.78             | 8.90                                         |  |
| November                  |                                  | 1.5             | 228                               | 126.2                              | 14.39                              | 4.78                               | 47.1            | 0.72             | 9.61                                         |  |
| December                  |                                  | 0.4             | 210                               | 93.69                              | 13.55                              | 3.89                               | 40.6            | 0.54             | 9.66                                         |  |
| Total/average             |                                  | 286.80          | 3365.00                           | 194.82                             | 20.12                              | 11.15                              | 1250.10         | 1.10             | 8.97                                         |  |
| Dormancy                  | December-March                   | 91.9            | 223.5                             | 128.91                             | 14.605                             | 4.825                              | 246.4           | 0.64             | 9.78                                         |  |
| Budburst-Fruit set        | April-May                        | 69.7            | 320.5                             | 235.635                            | 20.555                             | 9.985                              | 248.7           | 1.02             | 10.57                                        |  |
| Fruit-set-veraison        | June-July                        | 1.5             | 363.5                             | 315.575                            | 27.675                             | 20.9                               | 373.1           | 1.98             | 6.78                                         |  |
| Veraison-harvest          | August-mid-end September         | 37.6            | 314                               | 229.4                              | 26.02                              | 18.38                              | 268.4           | 1.57             | 7.64                                         |  |
| Postharvest               | mid-end september-October        | 86.1            | 237.5                             | 130.495                            | 17.265                             | 8.01                               | 113.7           | 0.75             | 9.26                                         |  |
| <b>Number of days</b>     |                                  |                 |                                   |                                    | <b>2007</b>                        |                                    |                 |                  |                                              |  |
|                           |                                  |                 | <b>T<sup>a</sup>max &gt; 35°C</b> | <b>T<sup>a</sup>max &gt; 30 °C</b> | <b>T<sup>a</sup>min &gt; 15 °C</b> | <b>T<sup>a</sup>min &lt; 15 °C</b> |                 |                  |                                              |  |
| <b>Budburst-Fruit set</b> | <b>April-May</b>                 |                 | 0                                 | 6                                  | 5                                  | 56                                 |                 |                  |                                              |  |
| <b>Fruit-set-veraison</b> | <b>June-July</b>                 |                 | 8                                 | 41                                 | 48                                 | 13                                 |                 |                  |                                              |  |
| <b>Veraison-harvest</b>   | <b>August-mid-end September</b>  |                 | 6                                 | 26                                 | 47                                 | 7                                  |                 |                  |                                              |  |
| <b>Postharvest</b>        | <b>mid-end september-October</b> |                 | 0                                 | 1                                  | 3                                  | 34                                 |                 |                  |                                              |  |

| <b>Climatic factors</b>   |                                  |                                   |                                              |                                     | <b>2008</b>                        |                              |                 |                  |                                              |  |
|---------------------------|----------------------------------|-----------------------------------|----------------------------------------------|-------------------------------------|------------------------------------|------------------------------|-----------------|------------------|----------------------------------------------|--|
|                           |                                  | <b>Rainfall<br/>(mm)</b>          | <b>Hours of sunshine<br/>(&gt;1200 W/m2)</b> | <b>Solar radiation<br/>(MJ /m2)</b> | <b>T<sup>a</sup> max (°C)</b>      | <b>T<sup>a</sup>min (°C)</b> | <b>ETo (mm)</b> | <b>VPD (kPa)</b> | <b>Dif T<sup>a</sup>max-T<sup>a</sup>min</b> |  |
| January                   |                                  | 3.6                               | 215                                          | 109.61                              | 14.73                              | 3.74                         | 44.6            | 0.57             | 10.99                                        |  |
| February                  |                                  | 18.1                              | 203                                          | 115.55                              | 13.54                              | 7.23                         | 47.9            | 0.49             | 6.31                                         |  |
| March                     |                                  | 2.6                               | 303                                          | 212.14                              | 18.34                              | 6.04                         | 115             | 1.01             | 12.30                                        |  |
| April                     |                                  | 4.9                               | 321                                          | 250.05                              | 19.5                               | 12.17                        | 129.8           | 1.18             | 7.33                                         |  |
| May                       |                                  | 133.8                             | 324                                          | 232.03                              | 21.02                              | 12.11                        | 123.7           | 0.99             | 8.91                                         |  |
| June                      |                                  | 102.6                             | 347                                          | 304.53                              | 26.29                              | 13.39                        | 160.5           | 1.38             | 12.90                                        |  |
| July                      |                                  | 0.6                               | 367                                          | 298.62                              | 27.95                              | 19.96                        | 182.6           | 1.96             | 7.99                                         |  |
| August                    |                                  | 0                                 | 354                                          | 279.88                              | 29.24                              | 22.53                        | 172.2           | 2.02             | 6.71                                         |  |
| September                 |                                  | 61.8                              | 276                                          | 190.6                               | 25.16                              | 15.69                        | 107.2           | 1.37             | 9.47                                         |  |
| October                   |                                  | 31.3                              | 198                                          | 118.92                              | 21.14                              | 8.57                         | 63.6            | 0.71             | 12.57                                        |  |
| November                  |                                  | 14.8                              | 141                                          | 83.74                               | 12.45                              | 3.25                         | 40.6            | 0.54             | 9.20                                         |  |
| December                  |                                  | 2.5                               | 181                                          | 81.16                               | 12.78                              | 4.4                          | 34.7            | 0.38             | 8.38                                         |  |
| Total/average             |                                  | 376.60                            | 3230.00                                      | 189.74                              | 20.18                              | 10.76                        | 1222.30         | 1.05             | 9.42                                         |  |
| Dormancy                  | December-March                   | 26.8                              | 225.5                                        | 129.615                             | 14.8475                            | 5.3525                       | 242.2           | 0.61             | 9.50                                         |  |
| Budburst-Fruit set        | April-May                        | 138.7                             | 322.5                                        | 241.04                              | 20.26                              | 12.14                        | 253.5           | 1.09             | 8.12                                         |  |
| Fruit-set-veraison        | June-July                        | 103.2                             | 357                                          | 301.575                             | 27.12                              | 16.675                       | 343.1           | 1.67             | 10.45                                        |  |
| Veraison-harvest          | August-mid-end September         | 61.8                              | 315                                          | 235.24                              | 27.2                               | 19.11                        | 279.4           | 1.7              | 8.09                                         |  |
| Postharvest               | mid-end september-October        | 46.1                              | 169.5                                        | 101.33                              | 16.795                             | 5.91                         | 104.2           | 0.63             | 10.89                                        |  |
|                           | <b>Number of days</b>            |                                   | <b>2008</b>                                  |                                     |                                    |                              |                 |                  |                                              |  |
|                           |                                  | <b>T<sup>a</sup>max &gt; 35°C</b> | <b>T<sup>a</sup>max &gt; 30 °C</b>           | <b>T<sup>a</sup>min &gt; 15 °C</b>  | <b>T<sup>a</sup>min &lt; 15 °C</b> |                              |                 |                  |                                              |  |
| <b>Budburst-Fruit set</b> | <b>April-May</b>                 | 0                                 | 0                                            | 1                                   | 59                                 |                              |                 |                  |                                              |  |
| <b>Fruit-set-veraison</b> | <b>June-July</b>                 | 4                                 | 40                                           | 41                                  | 20                                 |                              |                 |                  |                                              |  |
| <b>Veraison-harvest</b>   | <b>August-mid-end September</b>  | 6                                 | 40                                           | 45                                  | 8                                  |                              |                 |                  |                                              |  |
| <b>Postharvest</b>        | <b>mid-end september-October</b> | 0                                 | 0                                            | 4                                   | 34                                 |                              |                 |                  |                                              |  |

| <b>Climatic factors</b>   |                                  |                           |                                   |                             |                            |                         |          |           |                                           |  |
|---------------------------|----------------------------------|---------------------------|-----------------------------------|-----------------------------|----------------------------|-------------------------|----------|-----------|-------------------------------------------|--|
|                           |                                  |                           |                                   |                             | 2009                       |                         |          |           |                                           |  |
|                           |                                  | Rainfall<br>(mm)          | Hours of sunshine<br>(>1200 W/m2) | Solar radiation<br>(MJ /m2) | T <sup>a</sup> max (°C)    | T <sup>a</sup> min (°C) | ETo (mm) | VPD (kPa) | Dif T <sup>a</sup> max-T <sup>a</sup> min |  |
| January                   |                                  | 16.6                      | 161                               | 71.51                       | 17.34                      | 0.61                    | 42.8     | 0.42      | 16.73                                     |  |
| February                  |                                  | 1.7                       | 187                               | 128.97                      | 12.36                      | 5.18                    | 50.3     | 0.52      | 7.18                                      |  |
| March                     |                                  | 45.4                      | 275                               | 181.29                      | 15.41                      | 7.57                    | 85.5     | 0.75      | 7.84                                      |  |
| April                     |                                  | 19.1                      | 322                               | 249.14                      | 17.37                      | 9.93                    | 110.1    | 0.83      | 7.44                                      |  |
| May                       |                                  | 7.3                       | 358                               | 284.68                      | 23.34                      | 14.32                   | 152.7    | 1.32      | 9.02                                      |  |
| June                      |                                  | 1.6                       | 359                               | 315.77                      | 28.51                      | 19.09                   | 188.1    | 2.1       | 9.42                                      |  |
| July                      |                                  | 0.1                       | 366                               | 296.95                      | 31.73                      | 22.69                   | 195.3    | 2.4       | 9.04                                      |  |
| August                    |                                  | 35.9                      | 223                               | 117.24                      | 27.09                      | 21.33                   | 112.4    | 1.94      | 5.76                                      |  |
| September                 |                                  | 27.5                      | 197                               | 93.79                       | 27.41                      | 16.72                   | 74.8     | 1.18      | 10.69                                     |  |
| October                   |                                  | 5.7                       | 217                               | 133.04                      | 21.56                      | 15.3                    | 73.5     | 1.14      | 6.26                                      |  |
| November                  |                                  | 5                         | 215                               | 124.53                      | 18.7                       | 7.31                    | 58.1     | 0.88      | 11.39                                     |  |
| December                  |                                  | 57.9                      | 193                               | 86.91                       | 15.76                      | -0.16                   | 38       | 0.49      | 15.92                                     |  |
| Total/average             |                                  | 224.00                    | 3073.00                           | 173.65                      | 21.38                      | 11.66                   | 1182.00  | 1.17      | 9.72                                      |  |
| Dormancy                  | December-March                   | 121.6                     | 204                               | 117.17                      | 15.2175                    | 3.3                     | 216.6    | 0.55      | 11.92                                     |  |
| Budburst-Fruit set        | April-May                        | 26.4                      | 340                               | 266.91                      | 20.355                     | 12.125                  | 262.8    | 1.08      | 8.23                                      |  |
| Fruit-set-veraison        | June-July                        | 1.7                       | 362.5                             | 306.36                      | 30.12                      | 20.89                   | 383.4    | 2.25      | 9.23                                      |  |
| Veraison-harvest          | August-mid-end September         | 63.4                      | 210                               | 105.515                     | 27.25                      | 19.025                  | 187.2    | 1.56      | 8.23                                      |  |
| Postharvest               | mid-end september-October        | 10.7                      | 216                               | 128.785                     | 20.13                      | 11.305                  | 131.6    | 1.01      | 8.83                                      |  |
| <b>Number of days</b>     |                                  |                           |                                   | 2009                        |                            |                         |          |           |                                           |  |
|                           |                                  | T <sup>a</sup> max > 35°C | T <sup>a</sup> max > 30 °C        | T <sup>a</sup> min > 15 °C  | T <sup>a</sup> min < 15 °C |                         |          |           |                                           |  |
| <b>Budburst-Fruit set</b> | <b>April-May</b>                 | 0                         | 1                                 | 2                           | 57                         |                         |          |           |                                           |  |
| <b>Fruit-set-veraison</b> | <b>June-July</b>                 | 19                        | 54                                | 51                          | 10                         |                         |          |           |                                           |  |
| <b>Veraison-harvest</b>   | <b>August-mid-end September</b>  | 4                         | 33                                | 44                          | 10                         |                         |          |           |                                           |  |
| <b>Postharvest</b>        | <b>mid-end september-October</b> | 0                         | 2                                 | 5                           | 33                         |                         |          |           |                                           |  |

| Climatic factors   |                           | 2010                      |                                   |                             |                            |                         |          |           |                                           |
|--------------------|---------------------------|---------------------------|-----------------------------------|-----------------------------|----------------------------|-------------------------|----------|-----------|-------------------------------------------|
|                    |                           | Rainfall<br>(mm)          | Hours of sunshine<br>(>1200 W/m2) | Solar radiation<br>(MJ /m2) | T <sup>a</sup> max (°C)    | T <sup>a</sup> min (°C) | ETo (mm) | VPD (kPa) | Dif T <sup>a</sup> max-T <sup>a</sup> min |
| January            |                           | 20.9                      | 185                               | 92.41                       | 12.76                      | 0.87                    | 38       | 0.37      | 11.89                                     |
| February           |                           | 20.6                      | 194                               | 112.6                       | 14.66                      | 3.01                    | 46.9     | 0.46      | 11.65                                     |
| March              |                           | 36.3                      | 270                               | 176.01                      | 14.16                      | 5.74                    | 74.4     | 0.55      | 8.42                                      |
| April              |                           | 15.1                      | 303                               | 220.57                      | 18.18                      | 10.35                   | 97.4     | 0.73      | 7.83                                      |
| May                |                           | 22.3                      | 351                               | 287.26                      | 22.4                       | 10.48                   | 145.9    | 1.17      | 11.92                                     |
| June               |                           | 39.8                      | 348                               | 294.64                      | 24.5                       | 15.8                    | 158.6    | 1.47      | 8.70                                      |
| July               |                           | 0.1                       | 368                               | 311.86                      | 28.71                      | 23.59                   | 189.2    | 1.98      | 5.12                                      |
| August             |                           | 33.4                      | 343                               | 259.56                      | 29.24                      | 20.8                    | 154.3    | 1.78      | 8.44                                      |
| September          |                           | 42                        | 300                               | 220.79                      | 24.37                      | 17.84                   | 109.4    | 1.35      | 6.53                                      |
| October            |                           | 18.7                      | 268                               | 162.49                      | 21.25                      | 10.88                   | 73       | 1.01      | 10.37                                     |
| November           |                           | 41.5                      | 200                               | 107.66                      | 16.04                      | 4.6                     | 50       | 0.63      | 11.44                                     |
| December           |                           | 14.4                      | 192                               | 84.25                       | 14.97                      | 1.27                    | 31.7     | 0.41      | 13.70                                     |
| Total/average      |                           | 305.00                    | 3322.00                           | 194.18                      | 20.10                      | 10.44                   | 1169.00  | 0.99      | 9.67                                      |
| Dormancy           | December-March            | 92.2                      | 210.25                            | 116.3175                    | 14.1375                    | 2.7225                  | 191      | 0.45      | 11.42                                     |
| Budburst-Fruit set | April-May                 | 37.4                      | 327                               | 253.915                     | 20.29                      | 10.415                  | 243.3    | 0.95      | 9.88                                      |
| Fruit-set-veraison | June-July                 | 39.9                      | 358                               | 303.25                      | 26.605                     | 19.695                  | 347.8    | 1.73      | 6.91                                      |
| Veraison-harvest   | August-mid-end September  | 75.4                      | 321.5                             | 240.175                     | 26.805                     | 19.32                   | 263.7    | 1.57      | 7.49                                      |
| Postharvest        | mid-end september-October | 60.2                      | 234                               | 135.075                     | 18.645                     | 7.74                    | 123      | 0.82      | 10.91                                     |
| Number of days     |                           | 2010                      |                                   |                             |                            |                         |          |           |                                           |
|                    |                           | T <sup>a</sup> max > 35°C | T <sup>a</sup> max > 30 °C        | T <sup>a</sup> min > 15 °C  | T <sup>a</sup> min < 15 °C |                         |          |           |                                           |
| Budburst-Fruit set | April-May                 | 0                         | 3                                 | 1                           | 60                         |                         |          |           |                                           |
| Fruit-set-veraison | June-July                 | 7                         | 43                                | 41                          | 20                         |                         |          |           |                                           |
| Veraison-harvest   | August-mid-end September  | 6                         | 31                                | 48                          | 6                          |                         |          |           |                                           |
| Postharvest        | mid-end september-October | 0                         | 0                                 | 5                           | 33                         |                         |          |           |                                           |

| Climatic factors          |                                  | 2011                              |                                                |                                          |                                    |                         |                      |           |                                           |
|---------------------------|----------------------------------|-----------------------------------|------------------------------------------------|------------------------------------------|------------------------------------|-------------------------|----------------------|-----------|-------------------------------------------|
|                           |                                  | Rainfall<br>(mm)                  | Hours of sunshine<br>(>1200 W/m <sup>2</sup> ) | Solar radiation<br>(MJ /m <sup>2</sup> ) | T <sup>a</sup> max (°C)            | T <sup>a</sup> min (°C) | ET <sub>o</sub> (mm) | VPD (kPa) | Dif T <sup>a</sup> max-T <sup>a</sup> min |
| January                   |                                  | 1.9                               | 205                                            | 99.65                                    | 12.84                              | 0.57                    | 35.2                 | 0.45      | 12.27                                     |
| February                  |                                  | 6.2                               | 232                                            | 153.11                                   | 15.9                               | 6.12                    | 63                   | 0.75      | 9.78                                      |
| March                     |                                  | 23                                | 257                                            | 155.41                                   | 15.92                              | 6.32                    | 73.8                 | 0.56      | 9.60                                      |
| April                     |                                  | 48.8                              | 258                                            | 224.45                                   | 21.52                              | 11.76                   | 96.8                 | 1.09      | 9.76                                      |
| May                       |                                  | 10.7                              | 315                                            | 266.38                                   | 23.43                              | 14.97                   | 140.1                | 1.2       | 8.46                                      |
| June                      |                                  | 3.5                               | 347                                            | 297.34                                   | 27.38                              | 16.29                   | 166.5                | 1.64      | 11.09                                     |
| July                      |                                  | 2.9                               | 363                                            | 303.72                                   | 28.65                              | 23.13                   | 188.2                | 2.02      | 5.52                                      |
| August                    |                                  | 3.1                               | 355                                            | 280.22                                   | 29.73                              | 23.26                   | 174.4                | 2.27      | 6.47                                      |
| September                 |                                  | 13.9                              | 180                                            | 215.47                                   | 24.87                              | 18.89                   | 117.3                | 1.56      | 5.98                                      |
| October                   |                                  | 1.7                               | 273                                            | 165.37                                   | 21.17                              | 13.25                   | 78.9                 | 1.14      | 7.92                                      |
| November                  |                                  | 46                                | 171                                            | 99.36                                    | 16.11                              | 8.52                    | 41.1                 | 0.51      | 7.59                                      |
| December                  |                                  | 0.2                               | 179                                            | 105.67                                   | 13.56                              | 5.43                    | 34.1                 | 0.57      | 8.13                                      |
| Total/average             |                                  | 167.10                            | 3135.00                                        | 197.18                                   | 20.92                              | 12.38                   | 1209.00              | 1.15      | 8.55                                      |
| Dormancy                  | December-March                   | 31.3                              | 218.25                                         | 128.46                                   | 14.555                             | 4.61                    | 206.1                | 0.58      | 9.95                                      |
| Budburst-Fruit set        | April-May                        | 59.5                              | 286.5                                          | 245.415                                  | 22.475                             | 13.365                  | 236.9                | 1.15      | 9.11                                      |
| Fruit-set-veraison        | June-July                        | 6.4                               | 355                                            | 300.53                                   | 28.015                             | 19.71                   | 354.7                | 1.83      | 8.31                                      |
| Veraison-harvest          | August-mid-end September         | 17                                | 267.5                                          | 247.845                                  | 27.3                               | 21.075                  | 291.7                | 1.92      | 6.23                                      |
| Postharvest               | mid-end september-October        | 47.7                              | 222                                            | 132.365                                  | 18.64                              | 10.885                  | 120                  | 0.83      | 7.76                                      |
| <b>Number of days</b>     |                                  | <b>2011</b>                       |                                                |                                          |                                    |                         |                      |           |                                           |
|                           |                                  | <b>T<sup>a</sup>max &gt; 35°C</b> | <b>T<sup>a</sup>max &gt; 30 °C</b>             | <b>T<sup>a</sup>min &gt; 15 °C</b>       | <b>T<sup>a</sup>min &lt; 15 °C</b> |                         |                      |           |                                           |
| <b>Budburst-Fruit set</b> | <b>April-May</b>                 | 0                                 | 6                                              | 2                                        | 59                                 |                         |                      |           |                                           |
| <b>Fruit-set-veraison</b> | <b>June-July</b>                 | 10                                | 47                                             | 48                                       | 13                                 |                         |                      |           |                                           |
| <b>Veraison-harvest</b>   | <b>August-mid-end September</b>  | 12                                | 43                                             | 48                                       | 5                                  |                         |                      |           |                                           |
| <b>Postharvest</b>        | <b>mid-end september-October</b> | 0                                 | 4                                              | 4                                        | 34                                 |                         |                      |           |                                           |

| Climatic factors          |                                  | 2012                              |                                                |                                          |                                    |                         |                      |           |                                       |
|---------------------------|----------------------------------|-----------------------------------|------------------------------------------------|------------------------------------------|------------------------------------|-------------------------|----------------------|-----------|---------------------------------------|
|                           |                                  | Rainfall<br>(mm)                  | Hours of sunshine<br>(>1200 W/m <sup>2</sup> ) | Solar radiation<br>(MJ /m <sup>2</sup> ) | T <sup>a</sup> max (°C)            | T <sup>a</sup> min (°C) | ET <sub>o</sub> (mm) | VPD (kPa) | Dif T <sup>a</sup> max-T <sup>a</sup> |
| January                   |                                  | 7                                 | 225                                            | 113.5                                    | 15.66                              | 4.96                    | 46.4                 | 0.58      | 10.70                                 |
| February                  |                                  | 2.4                               | 249                                            | 165.14                                   | 14.16                              | 0.97                    | 70.3                 | 0.71      | 13.19                                 |
| March                     |                                  | 55.7                              | 292                                            | 214.43                                   | 14.06                              | 4.6                     | 94.8                 | 0.86      | 9.46                                  |
| April                     |                                  | 23.3                              | 324                                            | 249.25                                   | 18.59                              | 10.36                   | 121.9                | 1.02      | 8.23                                  |
| May                       |                                  | 5.3                               | 364                                            | 306.69                                   | 25.58                              | 12.64                   | 167.8                | 1.63      | 12.94                                 |
| June                      |                                  | 1.3                               | 344                                            | 319.12                                   | 31.38                              | 20.8                    | 188.2                | 2.43      | 10.58                                 |
| July                      |                                  | 4.3                               | 367                                            | 313.16                                   | 28.49                              | 22.26                   | 195.6                | 2.17      | 6.23                                  |
| August                    |                                  | 3.4                               | 356                                            | 267.83                                   | 32.67                              | 22.91                   | 179.8                | 2.71      | 9.76                                  |
| September                 |                                  | 46.9                              | 280                                            | 213.83                                   | 25.67                              | 15.9                    | 118.2                | 1.67      | 9.77                                  |
| October                   |                                  | 54.4                              | 262                                            | 159.55                                   | 23.56                              | 8.66                    | 72.6                 | 0.96      | 14.90                                 |
| November                  |                                  | 81.2                              | 182                                            | 89.21                                    | 17.63                              | 5.91                    | 36.8                 | 0.39      | 11.72                                 |
| December                  |                                  | 3.2                               | 223                                            | 100.14                                   | 13.53                              | 4.26                    | 37.8                 | 0.55      | 9.27                                  |
| Total/average             |                                  | 288.00                            | 3468.00                                        | 209.32                                   | 21.75                              | 11.19                   | 1330.00              | 1.31      | 10.56                                 |
| Dormancy                  | December-March                   | 68.3                              | 247.25                                         | 148.3025                                 | 14.3525                            | 3.6975                  | 249.3                | 0.68      | 10.66                                 |
| Budburst-Fruit set        | April-May                        | 28.6                              | 344                                            | 277.97                                   | 22.085                             | 11.5                    | 289.7                | 1.33      | 10.59                                 |
| Fruit-set-veraison        | June-July                        | 5.6                               | 355.5                                          | 316.14                                   | 29.935                             | 21.53                   | 383.8                | 2.3       | 8.41                                  |
| Veraison-harvest          | August-mid-end September         | 50.3                              | 318                                            | 240.83                                   | 29.17                              | 19.405                  | 298                  | 2.19      | 9.77                                  |
| Postharvest               | mid-end september-October        | 135.6                             | 222                                            | 124.38                                   | 20.595                             | 7.285                   | 109.4                | 0.68      | 13.31                                 |
| <b>Number of days</b>     |                                  | <b>2012</b>                       |                                                |                                          |                                    |                         |                      |           |                                       |
|                           |                                  | <b>T<sup>a</sup>max &gt; 35°C</b> | <b>T<sup>a</sup>max &gt; 30 °C</b>             | <b>T<sup>a</sup>min &gt; 15 °C</b>       | <b>T<sup>a</sup>min &lt; 15 °C</b> |                         |                      |           |                                       |
| <b>Budburst-Fruit set</b> | <b>April-May</b>                 | 0                                 | 7                                              | 4                                        | 57                                 |                         |                      |           |                                       |
| <b>Fruit-set-veraison</b> | <b>June-July</b>                 | 15                                | 53                                             | 50                                       | 10                                 |                         |                      |           |                                       |
| <b>Veraison-harvest</b>   | <b>August-mid-end September</b>  | 21                                | 40                                             | 43                                       | 9                                  |                         |                      |           |                                       |
| <b>Postharvest</b>        | <b>mid-end september-October</b> | 0                                 | 3                                              | 8                                        | 30                                 |                         |                      |           |                                       |
