# Supplementary material
Source: publisher site journal article supplement (https://www.dovepress.com/article/107312)
Supplement: Supplementary file 2 [file get_supplementary_file.php%3Ff%3D107312_2.pdf]

Table 1. Mean values of yield and several berry and wine quality indices calculated for each year and treatment during the experimental period (2006-2012).

| Treat. | SDI                              | PRI-1   | RDI-1   | PRI-2   | RDI-2   | ANOVA | Irrig. vol | Irrig. sys | Irrig. Vol. x Irrig. sys. |
|--------|----------------------------------|---------|---------|---------|---------|-------|------------|------------|---------------------------|
| Year   | QI <sub>Technologicalberry</sub> |         |         |         |         |       |            |            |                           |
| 2006   | 6.75a                            | 4.50b   | 5.00b   | 4.00b   | 5.00b   | **    | ns         | ns         | ns                        |
| 2007   | 9.00                             | 8.25    | 9.00    | 8.25    | 6.75    | ns    | ns         | ns         | ns                        |
| 2008   | 10.75ab                          | 11.00a  | 8.50b   | 9.25ab  | 9.75ab  | *     | ns         | ns         | *                         |
| 2009   | 4.50                             | 6.50    | 6.50    | 6.75    | 6.75    | ns    | ns         | ns         | ns                        |
| 2010   | 8.75c                            | 10.5b   | 12.00a  | 11.25ab | 9.25c   | ***   | *          | ns         | ***                       |
| 2011   | 9.75a                            | 8.25ab  | 7.25bc  | 6.00c   | 6.50bc  | *     | *          | ns         | ns                        |
| 2012   | 6.25a                            | 4.75ab  | 4.75ab  | 4.50ab  | 4.00b   | *     | ns         | ns         | ns                        |
|        | QI <sub>phenolicberry</sub>      |         |         |         |         |       |            |            |                           |
| 2006   | 2.75b                            | 2.50b   | 4.00ab  | 5.25a   | 5.00a   | *     | **         | ns         | ns                        |
| 2007   | 5.50c                            | 6.75bc  | 7.50ab  | 8.25ab  | 8.50a   | *     | *          | ns         | ns                        |
| 2008   | 7.50                             | 8.00    | 7.50    | 8.50    | 7.75    | ns    | ns         | ns         | ns                        |
| 2009   | 5.75                             | 6.50    | 5.88    | 4.00    | 6.25    | ns    | ns         | ns         | ns                        |
| 2010   | 5.75a                            | 8.00bc  | 9.13c   | 9.00bc  | 7.38b   | **    | ns         | ns         | *                         |
| 2011   | 4.50ab                           | 6.63a   | 6.00a   | 3.13b   | 3.00b   | *     | **         | ns         | ns                        |
| 2012   | 4.00                             | 5.25    | 5.88    | 4.75    | 5.88    | ns    | ns         | ns         | ns                        |
|        | QI <sub>overallberry</sub>       |         |         |         |         |       |            |            |                           |
| 2006   | 9.50ab                           | 7.00b   | 9.00ab  | 9.25ab  | 10.00a  | *     | *          | ns         | ns                        |
| 2007   | 14.50                            | 15.00   | 16.50   | 16.50   | 15.25   | ns    | ns         | ns         | ns                        |
| 2008   | 18.25ab                          | 19.00a  | 16.00b  | 17.75ab | 17.50ab | *     | ns         | ns         | ns                        |
| 2009   | 10.25                            | 13.00   | 11.88   | 10.75   | 13.00   | ns    | ns         | ns         | ns                        |
| 2010   | 14.50d                           | 18.50bc | 21.13a  | 20.25ab | 16.63c  | ***   | ns         | ns         | ***                       |
| 2011   | 14.25a                           | 14.88a  | 13.25ab | 9.13b   | 9.50b   | *     | **         | ns         | ns                        |
| 2012   | 10.25                            | 10.00   | 10.63   | 9.25    | 9.88    | ns    | ns         | ns         | ns                        |
|        | Yield (kg ha <sup>-1</sup> )     |         |         |         |         |       |            |            |                           |
| 2006   | 18,974a                          | 14,901b | 14,372b | 11,859c | 11,739c | ***   | ***        | ns         | ns                        |
| 2007   | 18,471a                          | 11,882b | 11,290b | 8,609b  | 9,075b  | ***   | ***        | ns         | ns                        |
| 2008   | 16,895a                          | 13,674b | 13,718b | 10,342c | 8,633c  | ***   | ***        | ns         | ns                        |
| 2009   | 13,516a                          | 9,195b  | 7,284bc | 6,332c  | 6,494bc | ***   | *          | ns         | ns                        |
| 2010   | 10,900a                          | 6,705b  | 5,799b  | 3,974b  | 5,257b  | **    | ns         | ns         | ns                        |
| 2011   | 11,169a                          | 7,764b  | 6,896bc | 3,978d  | 4,816cd | ***   | ***        | ns         | ns                        |
| 2012   | 8,513a                           | 4,494b  | 4,098bc | 2,771c  | 2,802c  | ***   | **         | ns         | ns                        |
|        | QI <sub>wine</sub>               |         |         |         |         |       |            |            |                           |
| 2006   | 2.00                             | 1.63    | 1.63    | 1.25    | 1.88    | ns    | ns         | ns         | ns                        |
| 2007   | 3.00                             | 3.25    | 3.25    | 3.75    | 3.25    | ns    | ns         | sn         | ns                        |
| 2008   | 3.63a                            | 3.88a   | 2.88ab  | 2.25b   | 3.13ab  | *     | ns         | ns         | ns                        |
| 2009   | 1.75ab                           | 2.00ab  | 2.50a   | 0.88b   | 0.75b   | *     | **         | ns         | ns                        |
| 2010   | 1.75a                            | 3.31b   | 3.31b   | 3.44b   | 3.13b   | **    | ns         | ns         | ns                        |
| 2011   | -                                | -       | -       | -       | -       | -     |            |            |                           |
| 2012   | -                                | -       | -       | -       | -       | -     |            |            |                           |

ns, not significant; P<0.05\*; P<0.01\*\*; P<0.001\*\*\*. Separation was by Duncan's multiple range test at the 95% confidence level
